# Supplementary material for: Fluorescence detection of Mn2+, Cr2O72−and nitroexplosives and photocatalytic degradation of methyl violet and rhodamine B based on two stable metal–organic frameworks
Source: Royal Society of Chemistry journal article supplement (doi:10.1039/c6ra28728j), 2017-01-01
Supplement: c6ra28728j1.pdf [file c6ra28728j1.pdf]

## Supporting Information

# Fluorescence detection of $\text{Mn}^{2+}$ , $\text{Cr}_2\text{O}_7^{2-}$ and nitroexplosives and photocatalytic degradation of methyl violet and Rhodamine based on two stable metal-organic frameworks

Yu Wu<sup>a\*</sup>, Jian Wu<sup>b</sup>, Zhidong Luo<sup>c</sup>, Jun Wang<sup>a</sup>, Yulong Li<sup>a</sup>, Yaoyao Han<sup>c</sup>, Jianqiang Liu<sup>c\*</sup>

### IR spectra

IR spectra of MOFs **1** and **2** displayed the characteristic asymmetric and symmetric stretching vibrations of carboxylate groups in the ranges from 1616 to 1498  $\text{cm}^{-1}$ , and from 1599 to 1428  $\text{cm}^{-1}$ , respectively. The disappearance of strong absorption bands around 1700  $\text{cm}^{-1}$  confirms complete deprotonation of the carboxylate groups of the  $\text{H}_2\text{dbp}$  ligands during the reactions (Fig. S1).

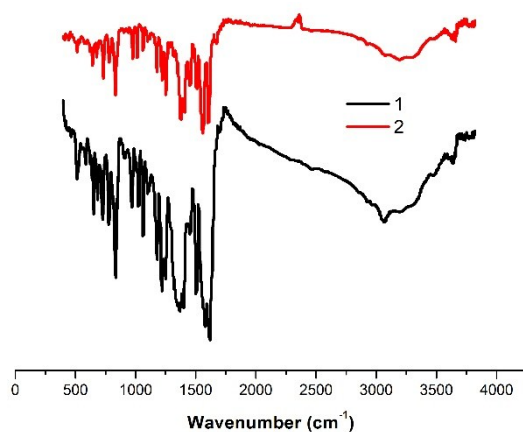

Fig. S1 view of the IR spectra of **1-2**.

### Thermogravimetric Analysis (TGA)

The thermogravimetric analyses (TGA) of title MOFs were examined (Fig. S2). In the case of **2** the first weight loss begins at 25°C and is completed at 110 °C. The observed weight loss of 12.2 % corresponds to the loss of the  $\text{CH}_3\text{CN}$  and  $\text{H}_2\text{O}$  molecules (calcd 12.9 %). The second weight loss can be attributed to the elimination of organic ligand. The TGA results indicates that the framework of both **1** and **2** began to collapse only at temperature above 350 °C.

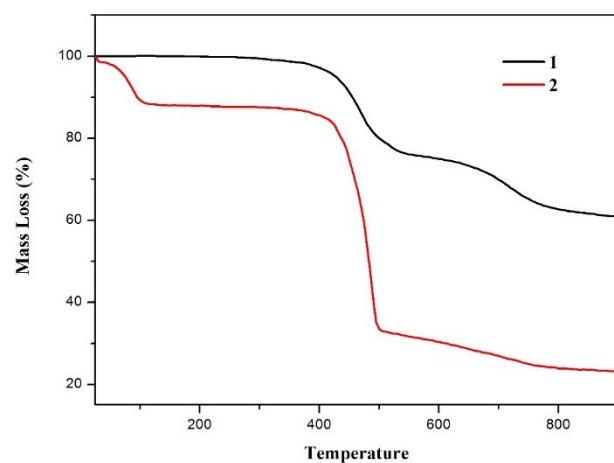

Fig. S2 view of the TGA of 1-2.

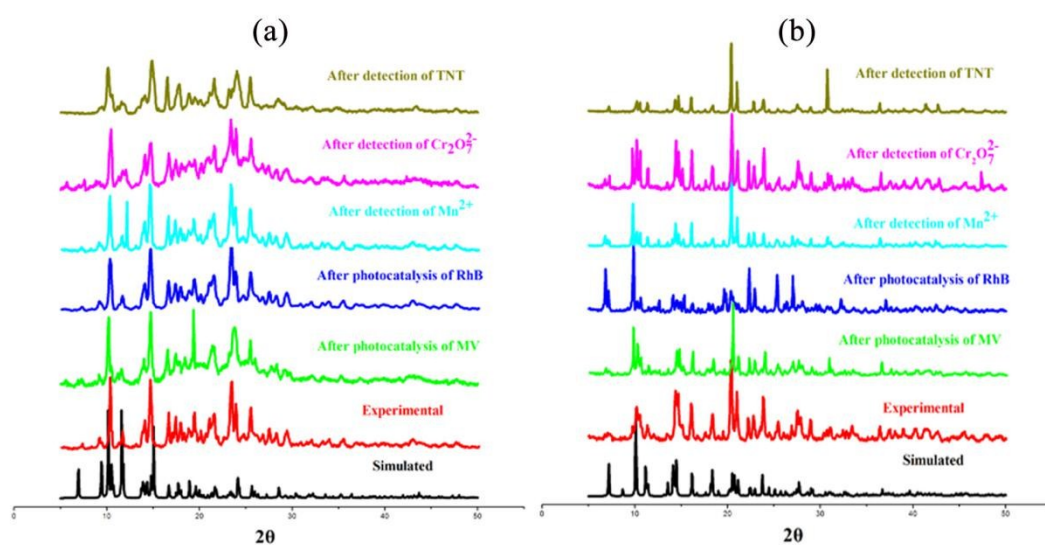

Fig. S3 (a) and (b) Powder XRD profiles of 1-2 after fluorescence sensing and photocatalysis, respectively.

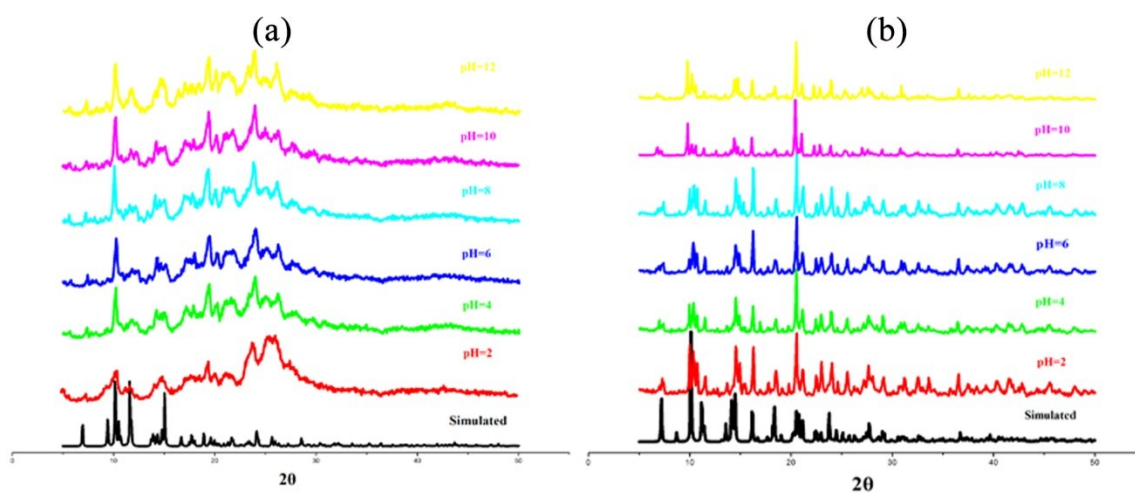

Fig. S4 (a) and (b) Powder XRD profiles of 1-2 under different pH, respectively.

## Measurements

The activated samples were prepared by soaking the as-synthesized samples in CH<sub>3</sub>OH for two days, then in CH<sub>2</sub>Cl<sub>2</sub> for three days and subsequent heating at 100 °C in a quartz tube under high vacuum for 20 h to remove the solvent molecules prior to measurements. The nitrogen adsorption-desorption measurements were carried out at liquid nitrogen temperature (77 K) by using automatic volumetric adsorption equipment (Micromeritics, ASAP2020).

The desorption hysteresis is related to the 1D narrow channel system, which hints the escape of adsorbed gas molecules. The saturated loading is 77 and 15 cm<sup>3</sup> (STP) g<sup>-1</sup> at around 700 Torr for **1** and **2**, respectively. The low N<sub>2</sub> adsorbed capacity for **1-2** indicated that the interpenetration greatly reduces the volume of the channel. Also, the difference loading can be attributed to the skelton of full networks between **1** and **2**.

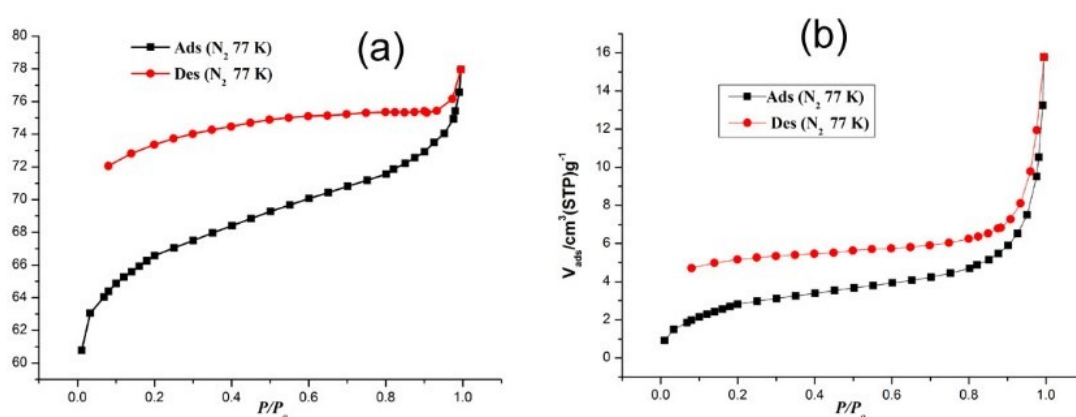

Fig. S5 (a) and (b) Gas sorption isotherms of N<sub>2</sub> (77 K) for **1** and **2**, respectively.

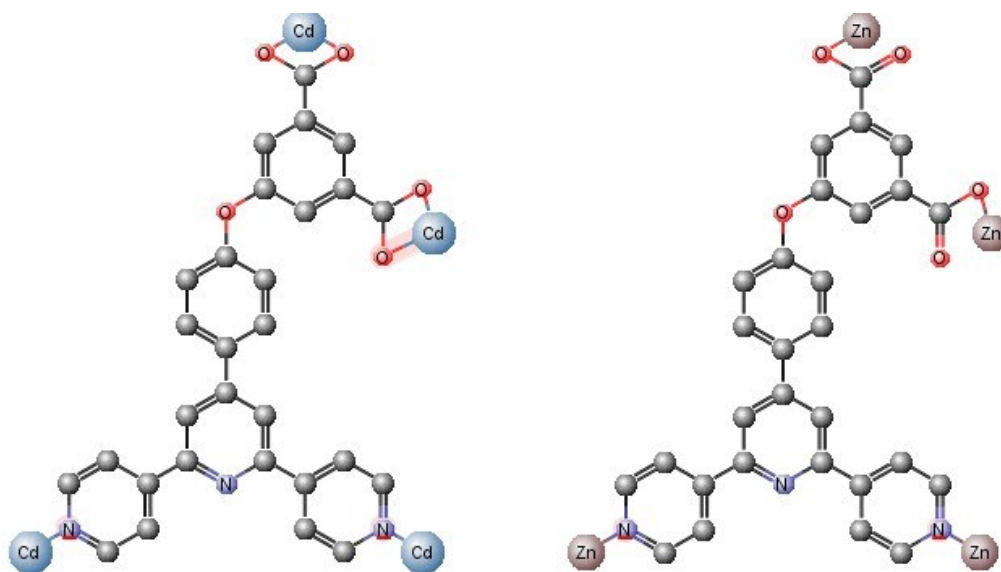

Scheme S1 View of the coordination modes of dbp in this work.

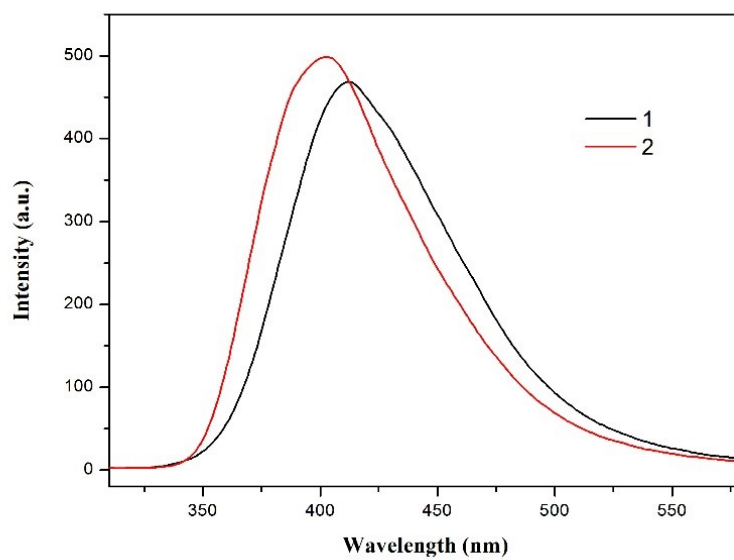

Fig. S6 View of the PL spectra of 1-2 ( $\lambda_{\text{ex}} = 315 \text{ nm}$ ).

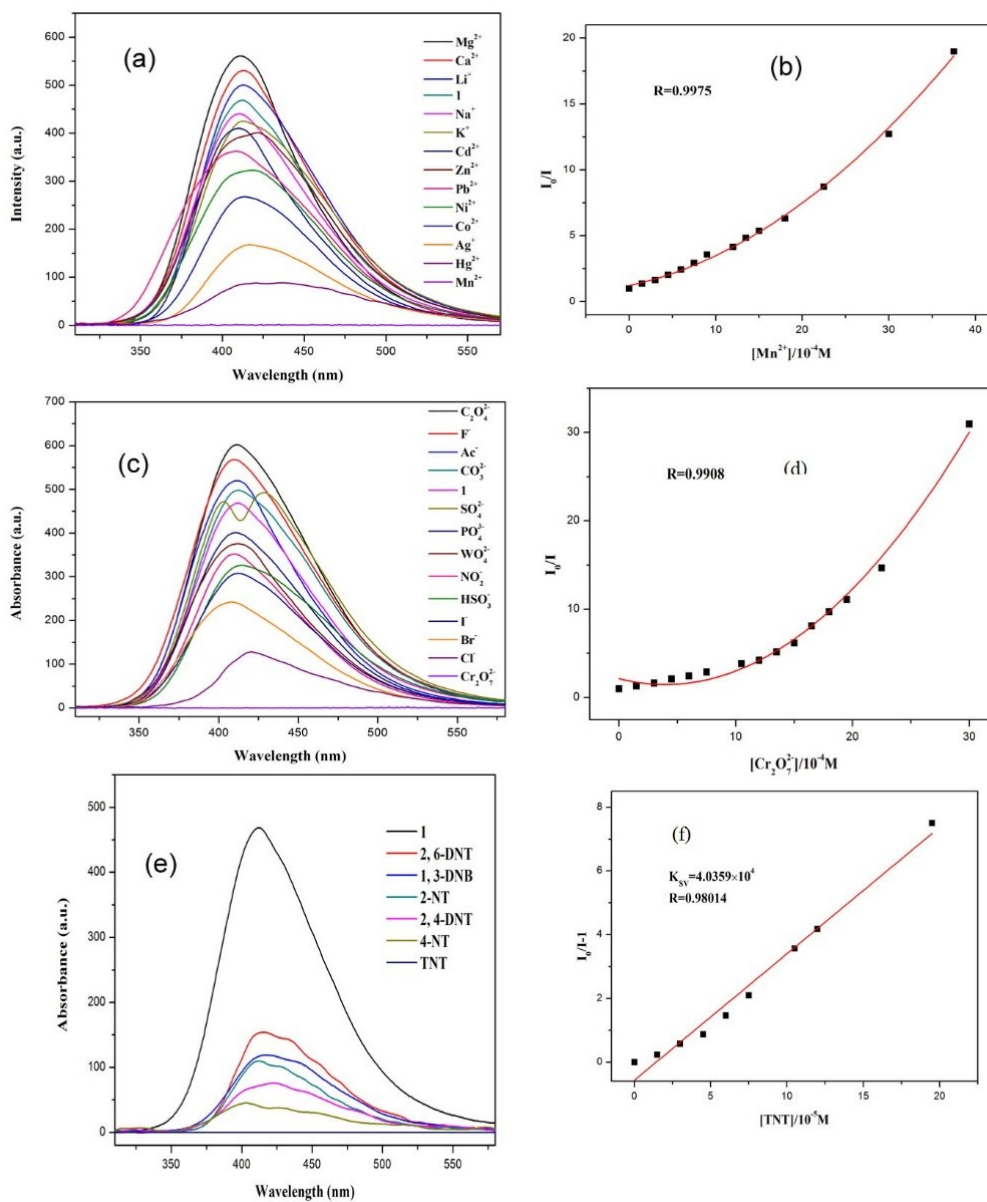

Fig. S7. a), c) and e) Emission spectra of **1** in different metal ions, anions and nitro-explosives (excited at 315 nm). b), d) and f) views of Stern–Volmer plots.

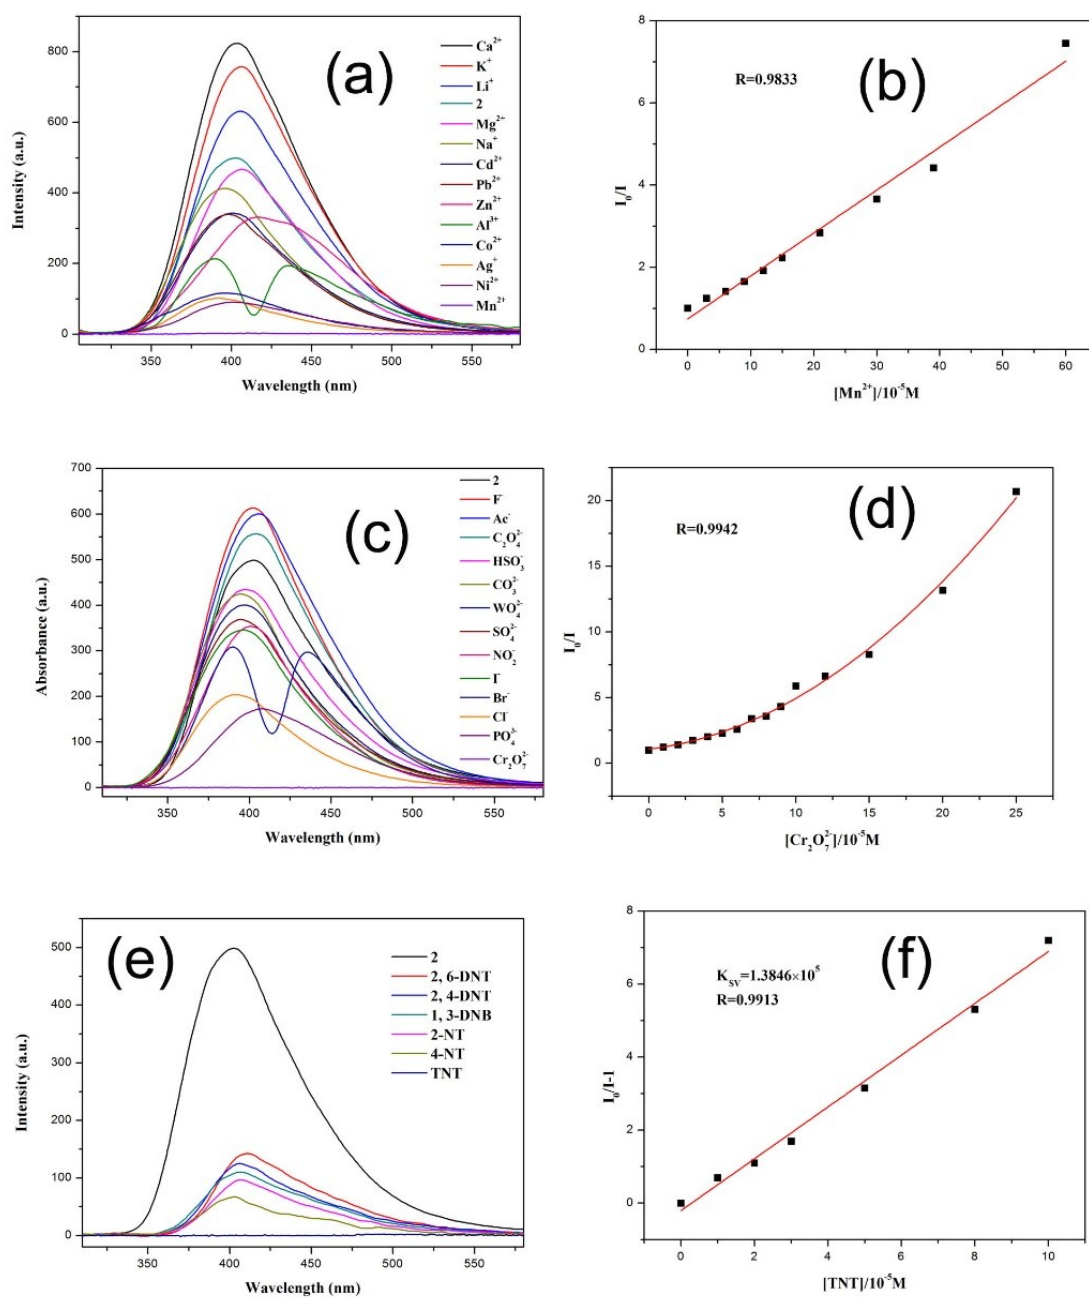

Fig. S8. a), c) and e) Emission spectra of **2** in different metal ions, anions and nitro-explosives (excited at 315 nm). b), d) and f) views of Stern–Volmer plots.

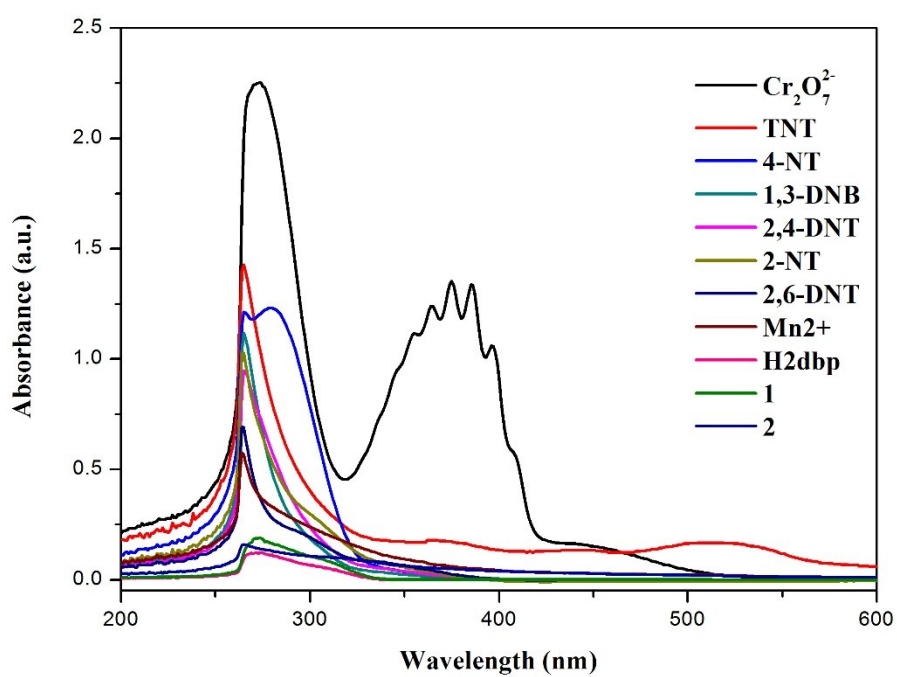

Fig. S9 The UV/vis absorption spectra for  $\text{Mn}^{2+}$ ,  $\text{Cr}_2\text{O}_7^{2-}$ , nitro-explosives and dbp.

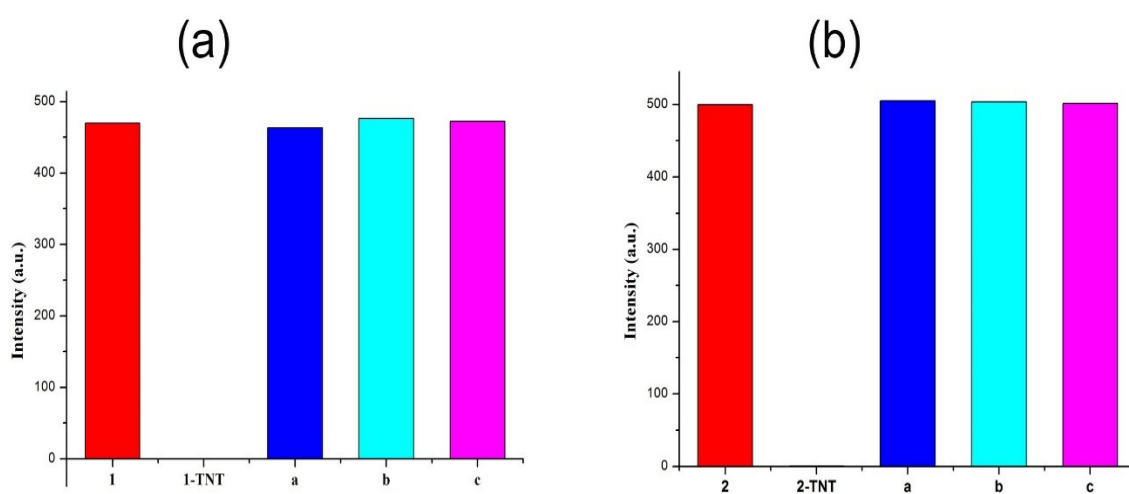

Fig. S10. The luminescence intensity of three recycles (a) after the first recycle, (b) after the second recycle, and (c) after the third recycle in **1-2**.



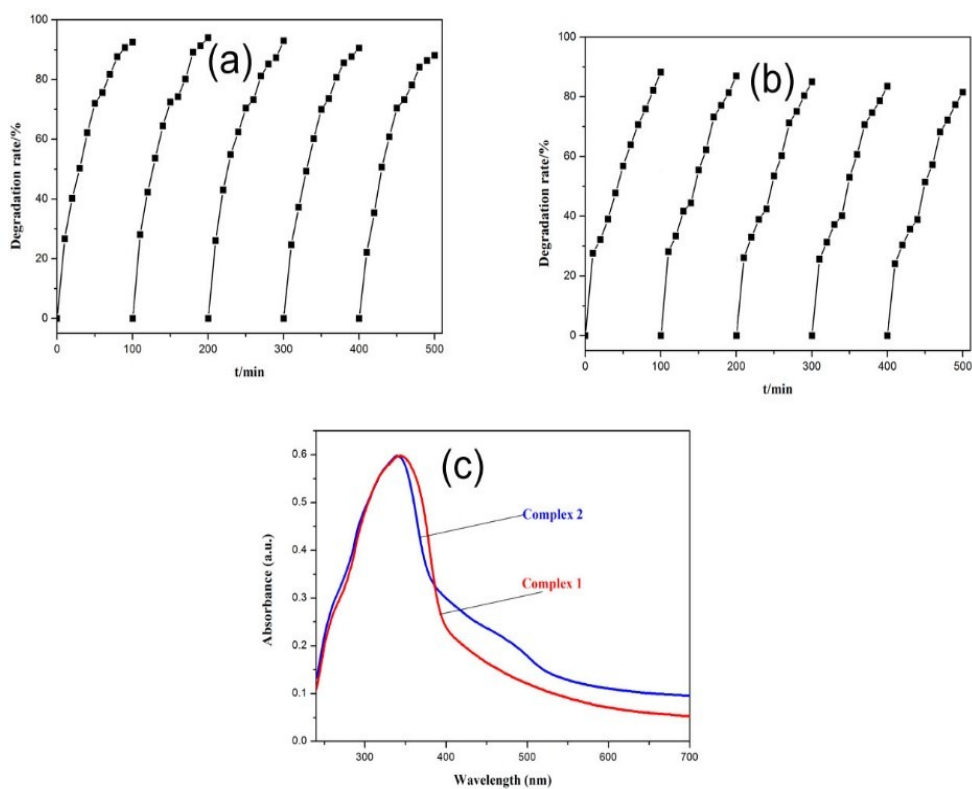

Fig. S11 (a) and (b) recycling tests of **2** towards MV and RhB photodegradation, respectively; (c) view of the UV-vis-NIR.

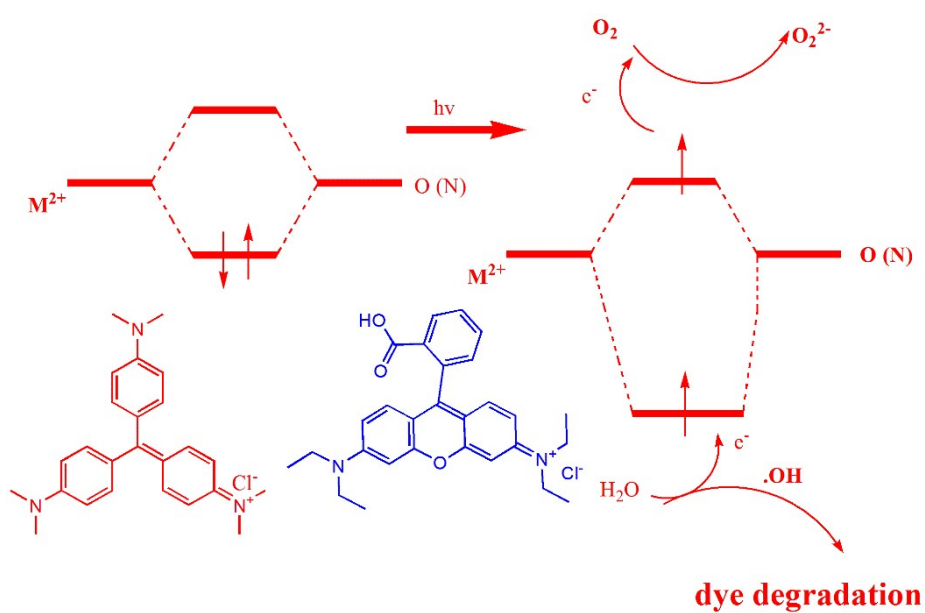

Scheme S2 Schematic of possible photocatalytic reaction mechanism of MV and Rh



B.

**Table S1.** Crystal data and structure refinement information for compounds **1** and **2**

| Parameter                                                                             | <b>1</b>                                                        | <b>2</b>                                                                     |
|---------------------------------------------------------------------------------------|-----------------------------------------------------------------|------------------------------------------------------------------------------|
| Formula                                                                               | <b>C<sub>29</sub>H<sub>17</sub>ZnN<sub>3</sub>O<sub>5</sub></b> | <b>C<sub>62</sub>H<sub>52</sub>Cd<sub>2</sub>N<sub>8</sub>O<sub>16</sub></b> |
| Formula weight                                                                        | 552.83                                                          | 1389.92                                                                      |
| Crystal system                                                                        | Monoclinic                                                      | Monoclinic                                                                   |
| Space group                                                                           | P21/c                                                           | P21/c                                                                        |
| Crystal color                                                                         | yellow                                                          | yellow                                                                       |
| <i>a</i> , [Å]                                                                        | 9.413(2)                                                        | 10.1676(16)                                                                  |
| <i>b</i> , [Å]                                                                        | 18.749(5)                                                       | 17.300(3)                                                                    |
| <i>c</i> , [Å]                                                                        | 17.387(5)                                                       | 17.485(3)                                                                    |
| $\alpha$ , [°]                                                                        | 90.00                                                           | 90                                                                           |
| $\beta$ , [°]                                                                         | 91.076(4)                                                       | 91.708(2)                                                                    |
| $\gamma$ , [°]                                                                        | 90.00                                                           | 90                                                                           |
| <i>V</i> , Å <sup>3</sup>                                                             | 3067.9(14)                                                      | 3074.3(9)                                                                    |
| <i>Z</i>                                                                              | 4                                                               | 2                                                                            |
| $\rho_{\text{calcd}}$ , g/cm <sup>3</sup>                                             | 1.197                                                           | 1.501                                                                        |
| $\mu$ , mm <sup>-1</sup>                                                              | 0.838                                                           | 0.767                                                                        |
| <i>F</i> (000)                                                                        | 1128                                                            | 1408                                                                         |
| $\theta$ Range, deg                                                                   | 2.42–25.01                                                      | 2.35–25.01                                                                   |
| Reflection collected                                                                  | 5391/3904                                                       | 15377/5413                                                                   |
| Goodness-of-fit on <i>F</i> <sup>2</sup>                                              | 1.062                                                           | 1.051                                                                        |
| <i>R</i> <sub>1</sub> , <i>wR</i> <sub>2</sub> ( <i>I</i> > 2 $\sigma$ ( <i>I</i> ))* | 0.0759, 0.0996                                                  | 0.0359, 0.0465                                                               |
| <i>R</i> <sub>1</sub> , <i>wR</i> <sub>2</sub> (all data)**                           | 0.1901, 0.1992                                                  | 0.0951, 0.1004                                                               |

\*  $R = \sum(F_o - F_c) / \sum(F_o)$ , \*\*  $wR_2 = \{\sum[w(F_o^2 - F_c^2)^2] / \sum(F_o^2)^2\}^{1/2}$ .

**Table S2.** Selected bond distances (Å) and angles (°) of structures **1-2****1**

|                     |            |                     |            |
|---------------------|------------|---------------------|------------|
| Zn(1)-O(2)#1        | 1.951(4)   | Zn(1)-O(4)#2        | 1.954(4)   |
| Zn(1)-N(3)#3        | 2.030(5)   | Zn(1)-N(1)          | 2.051(4)   |
| O(2)#1-Zn(1)-O(4)#2 | 115.85(17) | O(2)#1-Zn(1)-N(3)#3 | 101.19(19) |
| O(4)#2-Zn(1)-N(3)#3 | 116.76(19) | O(2)#1-Zn(1)-N(1)   | 120.7(2)   |
| O(4)#2-Zn(1)-N(1)   | 95.72(18)  | N(3)#3-Zn(1)-N(1)   | 107.4(2)   |

Symmetry codes: #1: -1+x, y, -1+z; #2: x, y, -1+z; #3: 1-x, 0.5+y, 0.5-z

**2**

|                     |            |                     |           |
|---------------------|------------|---------------------|-----------|
| Cd(1)-O(1)W         | 2.309(3)   | Cd(1)-O(2)#1        | 2.312(2)  |
| Cd(1)-N(1)          | 2.317(3)   | Cd(1)-O(4)#2        | 2.331(2)  |
| Cd(1)-N(3)#3        | 2.356(3)   | Cd(1)-O(3)#2        | 2.513(3)  |
| Cd(1)-O(1)#1        | 2.634(2)   |                     |           |
| O(1)W-Cd(1)-O(2)#1  | 86.18(9)   | O(1)W-Cd(1)-N(1)    | 90.82(10) |
| N(1)-Cd(1)-O(2)#1   | 139.04(9)  | O(1)W-Cd(1)-O(4)#2  | 91.15(10) |
| O(2)#1-Cd(1)-O(4)#2 | 84.95(9)   | O(1)#1-Cd(1)-O(3)#2 | 166.77(8) |
| N(3)#3-Cd(1)-O(1)#1 | 80.94(10)  | O(4)#2-Cd(1)-O(1)#1 | 137.16(8) |
| N(1)-Cd(1)-O(1)#1   | 86.83(9)   | O(1)W-Cd(1)-O(1)#1  | 89.27(9)  |
| N(3)#3-Cd(1)-O(3)#2 | 107.43(10) | O(4)#2-Cd(1)-O(3)#2 | 53.94(8)  |

Symmetry codes: #1: 1+x, y, 1+z; #2: x, y, 1+z; #3: 4-x, -0.5+y, 1.5-z
